# Supplementary material
Source: PubMed Central journal article supplement (PMC7668293)
Supplement: NIHMS1636909-supplement-1.pdf [file NIHMS1636909-supplement-1.pdf]

## SUPPLEMENTARY INFORMATION

**Table S1. PKC kinase family**

| Gene name | Common name                      | Group        | Kinase group | Activators                                      | Go6983 inhibitor <sup>a</sup> |
|-----------|----------------------------------|--------------|--------------|-------------------------------------------------|-------------------------------|
| PRKCA     | PKC $\alpha$                     | conventional | AGC          | diacylglycerol, Ca <sup>2+</sup> , phospholipid | +++                           |
| PRKCB     | PKC $\beta$ <sup>b</sup>         | conventional | AGC          | "                                               | +++                           |
| PRKCB     | PKC $\beta$ II <sup>b</sup>      | conventional | AGC          | "                                               | +++                           |
| PRKCG     | PKC $\gamma$                     | conventional | AGC          | "                                               | +++                           |
| PRKCD     | PKC $\delta$                     | novel        | AGC          | diacylglycerol, phospholipid                    | +++                           |
| PRKCE     | PKC $\epsilon$                   | novel        | AGC          | "                                               | –                             |
| PRKCH     | PKC $\eta$                       | novel        | AGC          | "                                               | –                             |
| PRKCQ     | PKC $\theta$                     | novel        | AGC          | "                                               | –                             |
| PRKCI     | PKC $\iota/\lambda$ <sup>c</sup> | atypical     | AGC          | phospholipid, ceramide, PAR6-CDC42              | –                             |
| PRKCZ     | PKC $\zeta$                      | atypical     | AGC          | "                                               | ++                            |
| PKN1      | PKC-related kinase 1             |              | AGC          | RAC and RHO                                     | –                             |
| PKN2      | PKC-related kinase 2             |              | AGC          | "                                               | –                             |
| PKN3      | PKC-related kinase 3             |              | AGC          | "                                               | –                             |
| PRKD1     | PKC $\mu$ , PKD1                 |              | CAMK         | diacylglycerol                                  | –                             |
| PRKD2     | PKD2                             |              | CAMK         | "                                               | –                             |
| PRKD3     | PKC $\nu$ , PKD3                 |              | CAMK         | "                                               | –                             |

<sup>a</sup> From Selleck (<https://www.selleckchem.com/products/go-6983.html>).

<sup>b</sup> PKC $\beta$ I is considered the main isoform and PKC $\beta$ II an alternatively spliced isoform encoded by the same gene.

<sup>c</sup> PKC $\iota$  is the human gene and PKC $\lambda$  is the mouse gene.
